# Supplementary material
Source: publisher site journal article supplement (https://www.dovepress.com/article/474263)
Supplement: Supplementary file 1 [file get_supplementary_file.php]

**Supporting information**

**Supplementary Table 1:**

**The constant term of the multifactorial logistic regression model**

| **Variables in the Equation** | | | | | | |
| --- | --- | --- | --- | --- | --- | --- |
|  | **B** | **SE** | **Wald** | **df** | **Sig.** | **Exp(B)** |
| **Constant** | -0.471 | 0.092 | 26.315 | 1.000 | 0.000 | 0.625 |

**Notes:** B: Intercept; SE: Standard Error; Wald: Wald Statistic; df: Degrees of Freedom; Sig.: Significance; Exp(B): Exponentiated B

**Supplementary Table 2: The corresponding model evaluation metrics**

| **AUC (95%CI)** | **Accuracy (95%CI)** | **Sensitivity (95%CI)** | **Specificity (95%CI)** | **PPV (95%CI)** | **NPV (95%CI)** | **cut off** |
| --- | --- | --- | --- | --- | --- | --- |
|
| 0.849 (0.815-0.882) | 0.763 (0.723-0.800) | 0.751 (0.690 - 0.812) | 0.770 (0.723 - 0.817) | 0.671 (0.609 - 0.734) | 0.832 (0.789 - 0.875) | 0.419 |

**Notes:** The optimal Youden index is 0.521, with a cutoff of 0.419.
